# Supplementary material
Source: HighWire-hosted journal article supplement (https://erj.ersjournals.com/content/59/3/2102511)

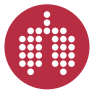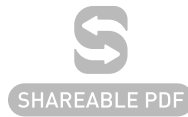

# Cycloserine did not increase depression incidence or severity at standard dosing for multidrug-resistant tuberculosis

Jeffrey A. Tornheim <sup>1</sup>, Zarir F. Udawadia<sup>2</sup>, Prerna R. Arora<sup>3</sup>, Ishita Gajjar<sup>3</sup>, Nikhil Gupte<sup>1,4</sup>, Samridhi Sharma<sup>3</sup>, Megha Karane<sup>3</sup>, Namrata Sawant<sup>3</sup>, Nisha Kharat<sup>3</sup>, Alexander J. Blum<sup>5</sup>, Shri Vijay Bala Yogendra Shivakumar<sup>4</sup>, Jai B. Mullerpattan<sup>2</sup>, Lancelot M. Pinto <sup>2</sup>, Tester F. Ashavaid<sup>3</sup>, Amita Gupta<sup>1,6</sup> and Camilla Rodrigues<sup>7</sup>

<sup>1</sup>Center for Clinical Global Health Education, Division of Infectious Diseases, Dept of Medicine, Johns Hopkins University School of Medicine, Baltimore, MD, USA. <sup>2</sup>Dept of Respiratory Medicine, P.D. Hinduja National Hospital and MRC, Mumbai, India. <sup>3</sup>Dept of Lab Medicine, P.D. Hinduja National Hospital and MRC, Mumbai, India. <sup>4</sup>Johns Hopkins University – India office (CCGHE), Pune, India. <sup>5</sup>Johns Hopkins University School of Medicine, Baltimore, MD, USA. <sup>6</sup>Dept of International Health, Johns Hopkins Bloomberg School of Public Health, Baltimore, MD, USA. <sup>7</sup>Dept of Microbiology, P.D. Hinduja National Hospital and MRC, Mumbai, India.

Corresponding author: Zarir F. Udawadia ([zfu@hindujahospital.com](mailto:zfu@hindujahospital.com))

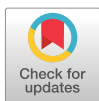

Shareable abstract (@ERSpublications)

**In a longitudinal cohort of MDR-TB patients receiving individualised, DST-based treatment, neither the inclusion of cycloserine in a multidrug regimen nor the dose used (up to 750 mg daily) significantly increased incidence of depression during treatment** <https://bit.ly/3GtQmOH>

**Cite this article as:** Tornheim JA, Udawadia ZF, Arora PR, *et al.* Cycloserine did not increase depression incidence or severity at standard dosing for multidrug-resistant tuberculosis. *Eur Respir J* 2022; 59: 2102511 [DOI: 10.1183/13993003.02511-2021].

This single-page version can be shared freely online.

Copyright ©The authors 2022.

This version is distributed under the terms of the Creative Commons Attribution Non-Commercial Licence 4.0. For commercial reproduction rights and permissions contact [permissions@ersnet.org](mailto:permissions@ersnet.org)

Received: 22 July 2021  
Accepted: 3 Dec 2021

*To the Editor:*

In 2018 cycloserine was elevated to World Health Organization (WHO) group B status for multidrug-resistant tuberculosis (MDR-TB), and is recommended in longer MDR-TB treatment regimens [1]. Inclusion of cycloserine is associated with improved MDR-TB treatment success and reduced mortality, but is limited by treatment-associated depression, psychosis and neuropathy, forcing 9% of patients to stop therapy [1–3]. Cycloserine also demonstrates wide interindividual pharmacokinetic variation, with significant food and drug interactions, leaving nearly half of patients with inappropriate drug levels [4, 5]. Optimal dosing is unknown [6], but modelling studies suggest doses from 250 mg to 750 mg twice daily, with 500 mg twice daily for paucibacillary disease and 750 mg twice daily for cavitary pulmonary disease [7]. Therefore, clinicians must balance the known benefits of cycloserine with the dearth of susceptibility- and drug-monitoring capacity and the spectre of treatment-limiting side-effects. To evaluate the impact of cycloserine prescription and dose on incident depression during MDR-TB treatment, we analysed longitudinal cohort data from India.

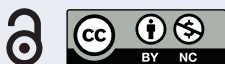

Supplement: inline-supplementary-material-1 [file inline-supplementary-material-1.pdf]
